# Supplementary material for: Small biomolecule sensors based on an innovative MoS2–rGO heterostructure modified electrode platform: a binder-free approach
Source: Royal Society of Chemistry journal article supplement (doi:10.1039/c7dt03888g), 2017-01-01
Supplement: c7dt03888g1.xlsx [file c7dt03888g1.xlsx]

## Sheet: Sheet1
Roughness Parameters
File: C:\Users\kaush\Documents\Mohit MOS2 RGO\MOS2 AFM\afmofmos2\MoS2.000
Data channel: Height
Selected line: (0, 0) to (255, 254) px
(0.02, 0.02) to (9.98, 9.94) µm
Amplitude
Roughness average (Ra): 3.5 nm
Root mean square roughness (Rq): 4.8 nm
Maximum height of the roughness (Rt): 32.2 nm
Maximum roughness valley depth (Rv): 12.6 nm
Maximum roughness peak height (Rp): 19.7 nm
Average maximum height of the roughness (Rtm): 19.5 nm
Average maximum roughness valley depth (Rvm): 9.9 nm
Average maximum roughness peak height (Rpm): 9.5 nm
Average third highest peak to third lowest valley height (R3z): 19.6 nm
Average third highest peak to third lowest valley height (R3z ISO): 4.8 nm
Average maximum height of the profile (Rz): 23.4 nm
Average maximum height of the roughness (Rz ISO): 19.5 nm
Skewness (Rsk): 0.543
Kurtosis (Rku): 5.067
Waviness average (Wa): 6.0 nm
Root mean square waviness (Wq): 8.2 nm
Waviness maximum height (Wy=Wmax): 131.2 nm
Maximum height of the profile (Pt): 139.2 nm
Spatial
Average wavelength of the profile (λa): 0.87 µm
Root mean square (RMS) wavelength of the profile (λq): 0.81 µm
Hybrid
Average absolute slope (Δa): 25.60 10^-3
Root mean square (RMS) slope (Δq): 0.03774
Length (L): 14.10 µm
Developed profile length (L0): 14.11 µm
Profile length ratio (lr): 1.001
