# Supplementary material for: Small biomolecule sensors based on an innovative MoS2–rGO heterostructure modified electrode platform: a binder-free approach
Source: Royal Society of Chemistry journal article supplement (doi:10.1039/c7dt03888g), 2017-01-01
Supplement: c7dt03888g2.xlsx [file c7dt03888g2.xlsx]

## Sheet: Sheet1
Statistical Quantities
File: C:\Users\kaush\Documents\Mohit MOS2 RGO\MOS2 AFM\afmofmos2\MoS2.000
Data channel: Height
Selected area: 256 × 256 at (0, 0) px
10.00 × 10.00 at (0.00, 0.00) µm
Mask in use: No
Minimum: 0.000 nm
Maximum: 178.582 nm
Average value: 56.894 nm
Median: 55.847 nm
Ra (Sa): 8.8285 nm
Rms (Sq): 12.5576 nm
Rms (grain-wise): 12.5576 nm
Skew: 0.9432
Kurtosis: 5.319
Surface area: 100.211 µm^2
Projected area: 100.0000 µm^2
Variation: 4.79407 µm^2
Entropy: -16.874
Entropy deficit: 0.10001
Inclination θ: 0.02 deg
Inclination φ: -178.65 deg
