# Supplementary material for: Small biomolecule sensors based on an innovative MoS2–rGO heterostructure modified electrode platform: a binder-free approach
Source: Royal Society of Chemistry journal article supplement (doi:10.1039/c7dt03888g), 2017-01-01
Supplement: c7dt03888g3.xlsx [file c7dt03888g3.xlsx]

## Sheet: Sheet1
Roughness Parameters
File: C:\Users\kaush\Documents\Mohit MOS2 RGO\MOS2 AFM\afmofmos2rgo\MoS2rGO.000
Data channel: Height
Selected line: (2, 3) to (255, 252) px
(0.10, 0.14) to (9.98, 9.86) µm
Amplitude
Roughness average (Ra): 16.0 nm
Root mean square roughness (Rq): 20.2 nm
Maximum height of the roughness (Rt): 106.4 nm
Maximum roughness valley depth (Rv): 52.6 nm
Maximum roughness peak height (Rp): 53.8 nm
Average maximum height of the roughness (Rtm): 78.9 nm
Average maximum roughness valley depth (Rvm): 41.8 nm
Average maximum roughness peak height (Rpm): 37.0 nm
Average third highest peak to third lowest valley height (R3z): 82.8 nm
Average third highest peak to third lowest valley height (R3z ISO): 24.7 nm
Average maximum height of the profile (Rz): 79.2 nm
Average maximum height of the roughness (Rz ISO): 78.9 nm
Skewness (Rsk): -0.069
Kurtosis (Rku): 2.792
Waviness average (Wa): 44.6 nm
Root mean square waviness (Wq): 60.5 nm
Waviness maximum height (Wy=Wmax): 570.0 nm
Maximum height of the profile (Pt): 580.5 nm
Spatial
Average wavelength of the profile (λa): 0.84 µm
Root mean square (RMS) wavelength of the profile (λq): 0.78 µm
Hybrid
Average absolute slope (Δa): 0.1200
Root mean square (RMS) slope (Δq): 0.1622
Length (L): 13.91 µm
Developed profile length (L0): 14.08 µm
Profile length ratio (lr): 1.017
