# Supplementary material for: Small biomolecule sensors based on an innovative MoS2–rGO heterostructure modified electrode platform: a binder-free approach
Source: Royal Society of Chemistry journal article supplement (doi:10.1039/c7dt03888g), 2017-01-01
Supplement: c7dt03888g4.xlsx [file c7dt03888g4.xlsx]

## Sheet: Sheet1
Statistical Quantities
File: C:\Users\kaush\Documents\Mohit MOS2 RGO\MOS2 AFM\afmofmos2rgo\MoS2rGO.000
Data channel: Height
Selected area: 256 × 256 at (0, 0) px
10.00 × 10.00 at (0.00, 0.00) µm
Mask in use: No
Minimum: 0.000 nm
Maximum: 818.621 nm
Average value: 247.490 nm
Median: 237.712 nm
Ra (Sa): 49.5861 nm
Rms (Sq): 78.0888 nm
Rms (grain-wise): 78.0888 nm
Skew: 1.666
Kurtosis: 8.394
Surface area: 105.762 µm^2
Projected area: 100.0000 µm^2
Variation: 27.1995 µm^2
Entropy: -15.23
Entropy deficit: 0.28308
Inclination θ: 0.22 deg
Inclination φ: 159.10 deg
